# Supplementary material
Source: PubMed Central journal article supplement (PMC2614044)
Supplement: 2008.158931_1.pdf [file 2008.158931_1.pdf]

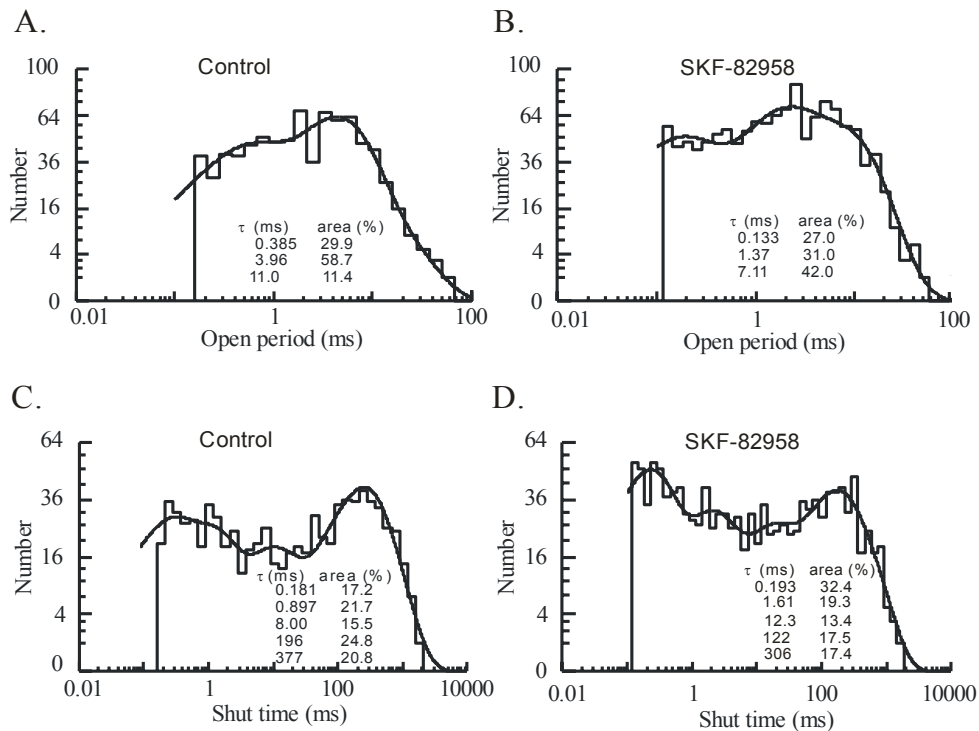

**Supplemental figure 1S. Lack of effect of 20nM SKF-82958 on NMDA channel open and closed times.**

Distributions of open times ranging from 0.15 to 100 ms (A) and 0.12 to 100 ms (B) were fitted with a mixture of three exponential components (time constants and associated areas are inset). Predicted mean open times were 3.69 ms for control (A) and 3.45 ms in SKF-82958 (B). From all patches the average mean open time was  $2.74 \pm 0.39$  ms in control and  $3.36 \pm 0.50$  ms in the presence of 20nM SKF-82958 ( $n = 21$ ,  $p > 0.05$ ). Neither the time constants nor relative areas of these exponential components were significantly affected by SKF-82958. The mean values of the time constants (and relative areas) were for control;  $0.155 \pm 0.035$  ms ( $39.3 \pm 4.14\%$ ),  $1.53 \pm 0.22$  ms ( $29.3 \pm 3.59\%$ ),  $7.90 \pm 0.837$  ms ( $28.7 \pm 4.05\%$ ) and for SKF-82958;  $0.223 \pm 0.061$  ms ( $41.3 \pm 4.8\%$ ),  $2.30 \pm 0.35$  ms ( $32.5 \pm 3.8\%$ ),  $9.57 \pm 1.14$  ms ( $26.3 \pm 3.5\%$ ).

Distributions of channel closed times ranging from 0.15 to 10,000 ms were fitted with a mixture of five exponential components. As with channel open times, channel shut times was not significantly affected by SKF-82958 (20 nM). The mean values of the distribution exponential time constants (and relative areas) were for control;  $0.167 \pm 0.032$  ms ( $21.7 \pm 3.68\%$ ),  $1.26 \pm 0.172$  ms ( $15.1 \pm 1.82\%$ ),  $14.3 \pm 3.58$  ms ( $15.3 \pm 2.06\%$ ),  $143.5 \pm 34.3$  ms ( $21.3 \pm 3.11\%$ ),  $523.2 \pm 68.2$  ms ( $27.3 \pm 5.44\%$ ) and in SKF-82958;  $0.125 \pm 0.050$  ms ( $23.0 \pm 3.86\%$ ),  $2.94 \pm 0.778$  ms ( $19.3 \pm 1.51\%$ ),  $22.7 \pm 5.65$  ms ( $18.8 \pm 4.55\%$ ),  $201 \pm 62.6$  ms ( $21.6 \pm 3.04\%$ ),  $963 \pm 367$  ( $22.0 \pm 4.19\%$ ). The mean shut times averaged from the five exponential components were  $167 \pm 37$  ms for control and  $160 \pm 46$  ms in the presence of SKF-82958. Although the mean value for channel shut times was not significantly different in SKF-82958 ( $p = 0.85$ ), the time constants of the second and third exponential component were significantly longer in SKF-82958.

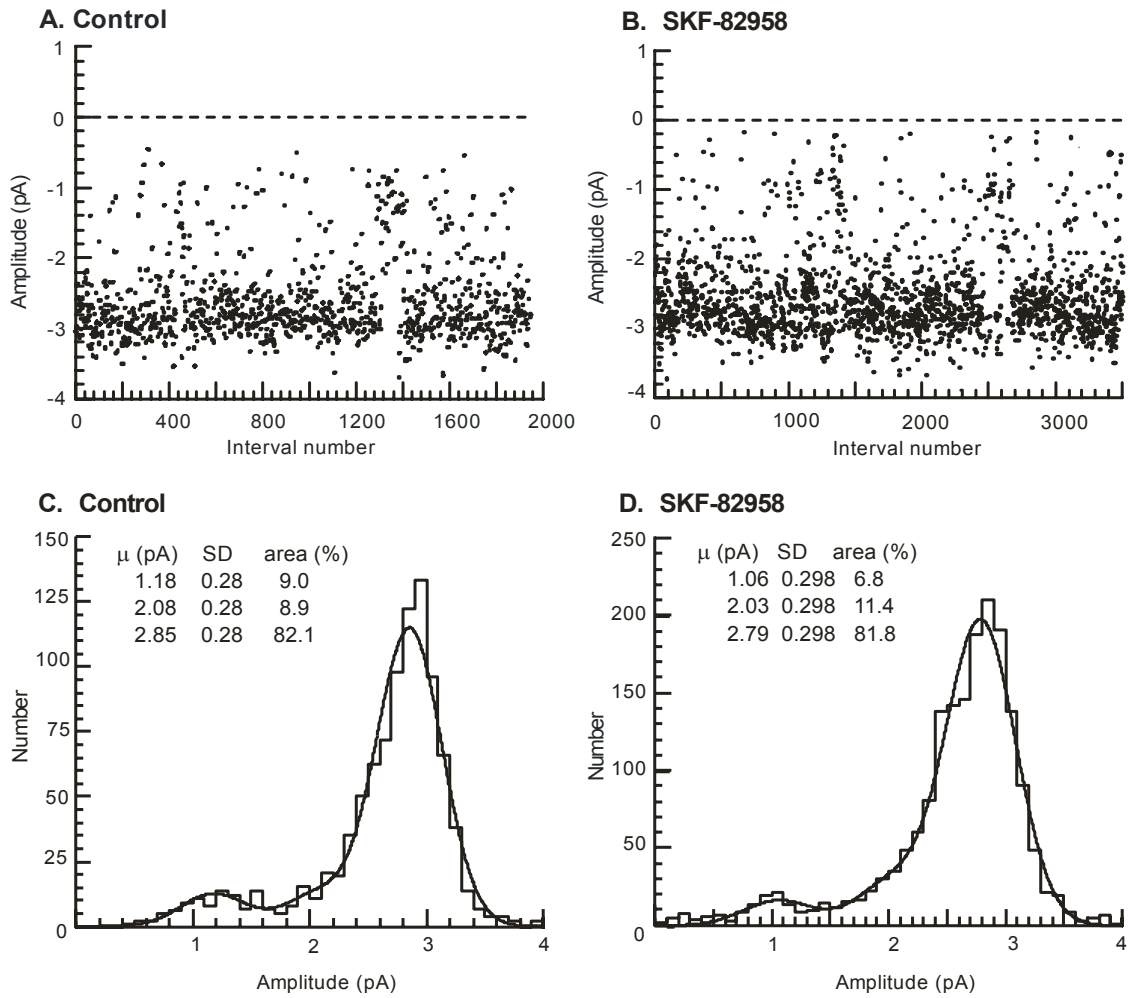

**Supplemental figure 2S. NMDA receptor single channel current amplitudes are not affected by SKF-82958.** *A* and *B*, stability plots of individual channel amplitude measurements at a holding potential of  $-60$  mV from the same patch in control (*A*) and in the presence of SKF-82958 (*B*). *C* and *D*, distributions of channel amplitude measurements from the same patch as illustrated in *A* and *B*, in control, *C* and in the presence of SKF-82958, *D* fitted with the sum of three Gaussian components illustrating the absence of effect of SKF-82958 on the mean current ( $\square$ ) of each component or its relative area.
